# Supplementary material
Source: PubMed Central journal article supplement (PMC2746424)
Supplement: NIHMS140902-supplement-1.pdf [file NIHMS140902-supplement-1.pdf]

Supplementary Table 1: Type 2 Diabetes study populations in DIAGRAM

| Study and Traits                                      | WTCCC<br>Cases | WTCCC<br>Controls | DGI<br>Cases | DGI<br>Controls | FUSION<br>Cases | FUSION<br>Controls |
|-------------------------------------------------------|----------------|-------------------|--------------|-----------------|-----------------|--------------------|
| Overall Sample Size                                   | 1924           | 2938              | 1464         | 1467            | 1161            | 1174               |
| Males (%)                                             | 58.1%          | 49.2%             | 50.6%        | 48.2%           | 56.2%           | 48.8%              |
| Age At Diagnosis, Mean<br>(SD) or <i>Median (IQR)</i> | 50.3 (9.2)     | -                 | 58 (10)      | -               | 53 (12.0)       |                    |
| BMI, Mean (SD) or<br><i>Median (IQR)</i>              | 31.3 (6.2)     | -                 | 28.5 (4.5)   | 26.6 (3.7)      | 29.8 (6.1)      | 26.8 (5.0)         |
